# Supplementary material
Source: PubMed Central journal article supplement (PMC4684168)
Supplement: NIHMS735157-supplement-supplement_1.pdf [file NIHMS735157-supplement-supplement_1.pdf]

## Supplemental figures

Figure S1

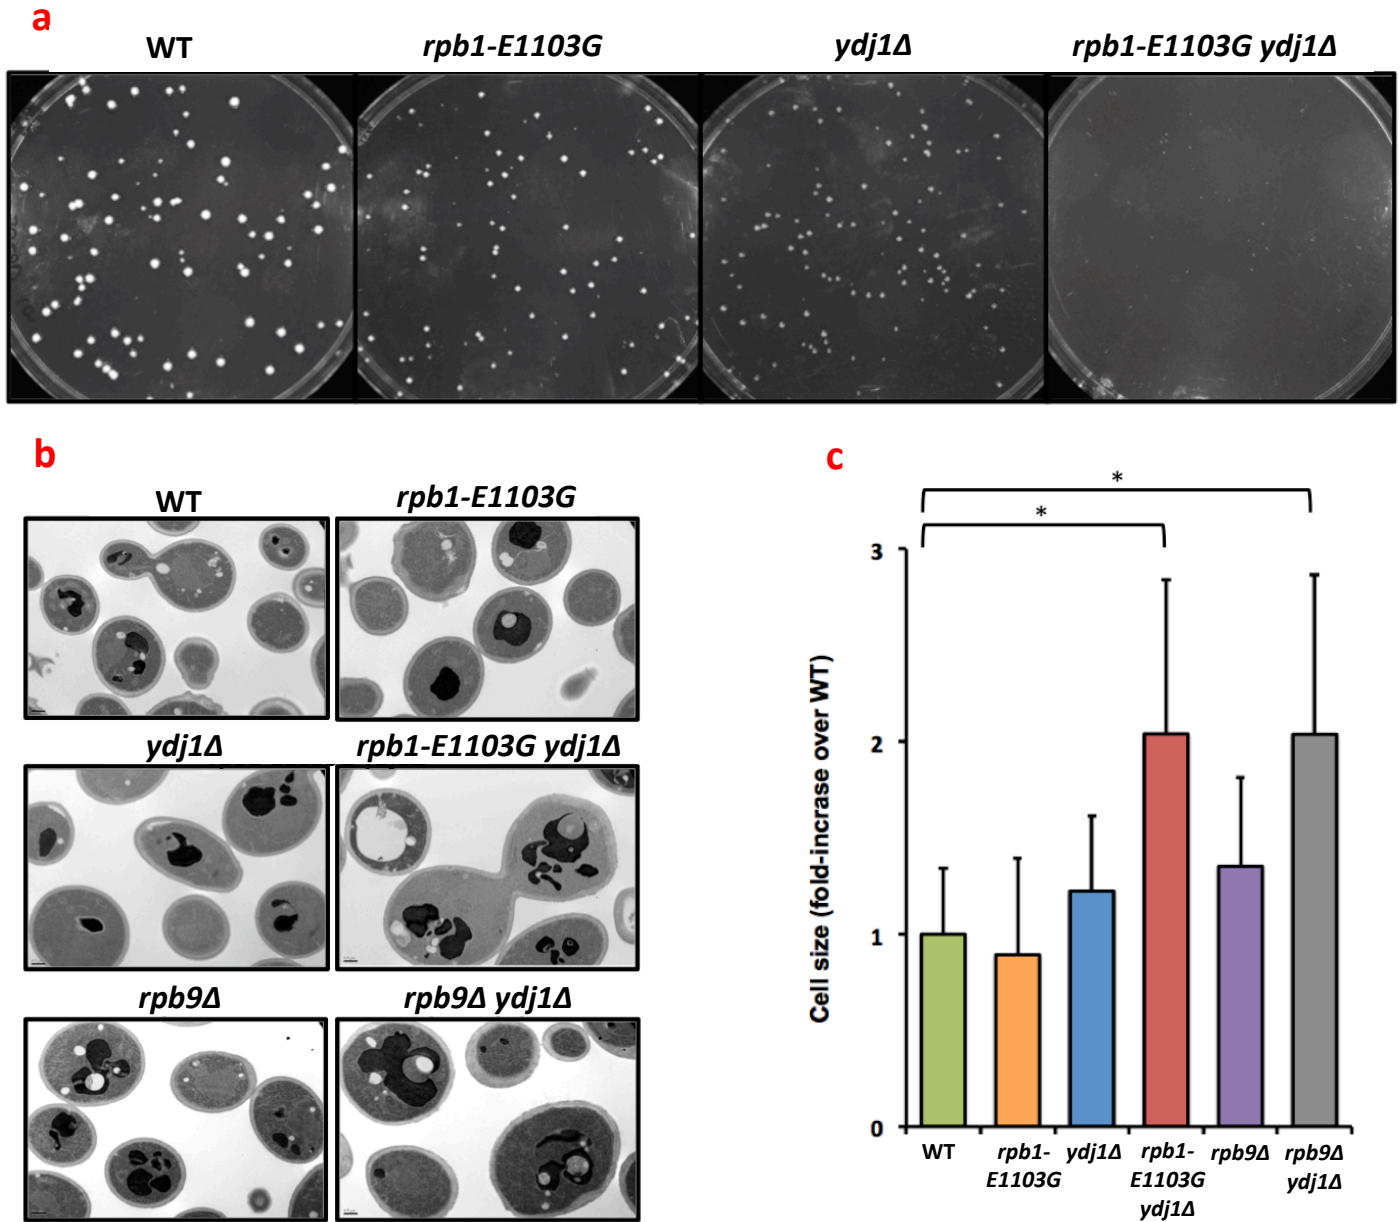

**Fig. S1.** Error prone cells grow slower than WT cells. (a) Cells were grown on a YAPD plate, and allowed to grow uninterrupted for 48 hours to form a colony. During that timespan, WT cells generate

larger colonies than *rpb1-E1103G* cells, *hsp40Δ* cells and *rpb1-E1103G ydj1Δ* cells. The growth defect of *rpb1-E1103G* cells is sufficient to genotype cells after sporulation (MVY0001, 2, 4, 5). (b) *rpb1-E1103G ydj1Δ* and *rpb9Δ ydj1Δ* cells are significantly larger than WT cells (MVY0001-6). (c) Quantification of cell size, as shown in fig. S1b. The volume of at least 50 cells was determined for each genotype (MVY0001-6).

Figure S2

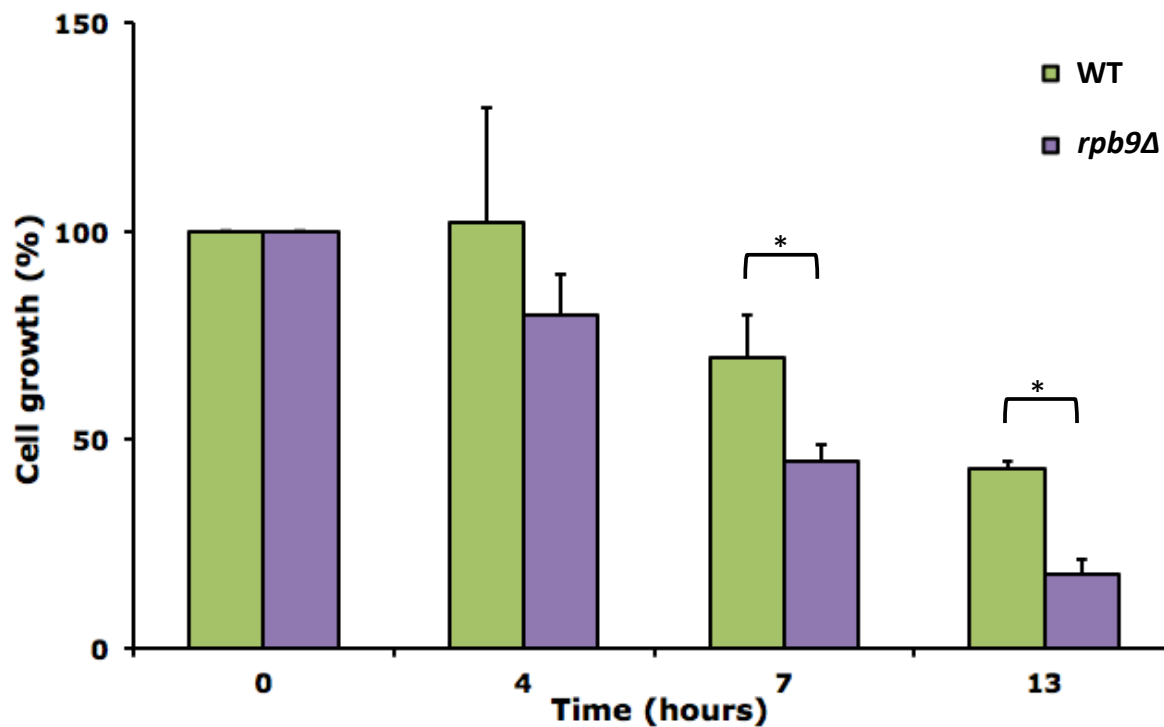

**Fig. S2.** *Rpb9Δ* cells are more sensitive to radicicol than WT cells. WT cells and *rpb9Δ* were diluted to OD 0.02, and allowed to grow for 13 hours in the presence of 200 $\mu$ M radicicol. The growth of the cells suspended in radicicol was then compared at three time intervals to cells that were grown in the absence of radicicol. *Rpb9Δ* cells exhibited a greater reduction in growth than WT cells (MVY0001, 3).

\*= P<0.05, \*\*= P<0.01

**Figure S3**

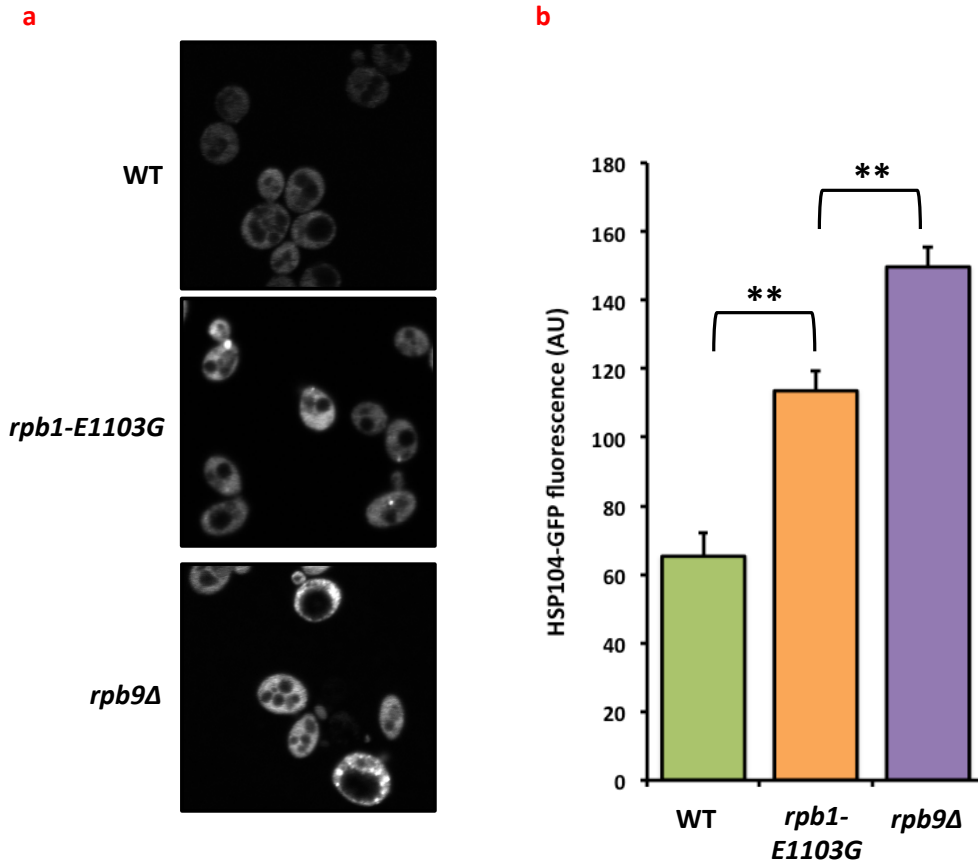

**Fig. S3.** Error prone cells exhibit greater Hsp104-GFP expression than WT cells (a) Cells received a chromosomally integrated copy of HSP104-GFP. The cell lines were grown into log phase and monitored under a con-focal microscope. The expression level of HSP104-GFP was then compared between the strains (MVY0001-3). (b) Quantification of images presented in figure 1a. We found that *rpb1-E1103G* and *rpb9Δ* cells exhibited greater expression than WT cells (AU= arbitrary units). Over a 100 cells were analyzed for each genotype (MVY0001-3).

\*= P<0.01

Figure S4

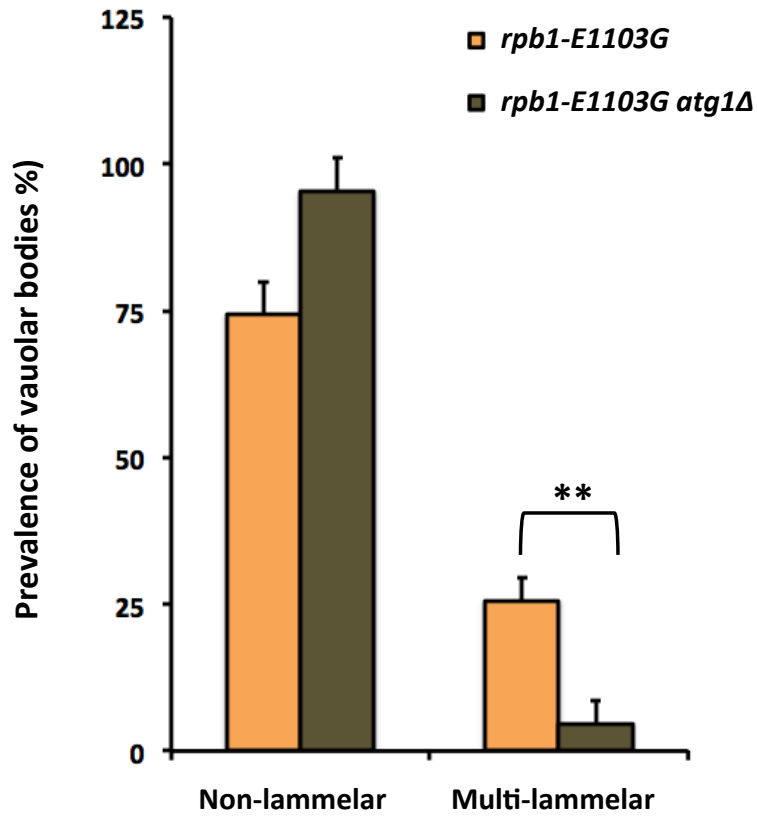

**Fig. S4.** *ATG1* deletion in error prone cells. Cells that have lost *ATG1* display a decreased amount of multi-lammellar structures inside vacuoles. Approximately 150 cells were monitored for each genotype (MVY0002, 12).

\*\*=  $P < 0.01$

**Figure S5**

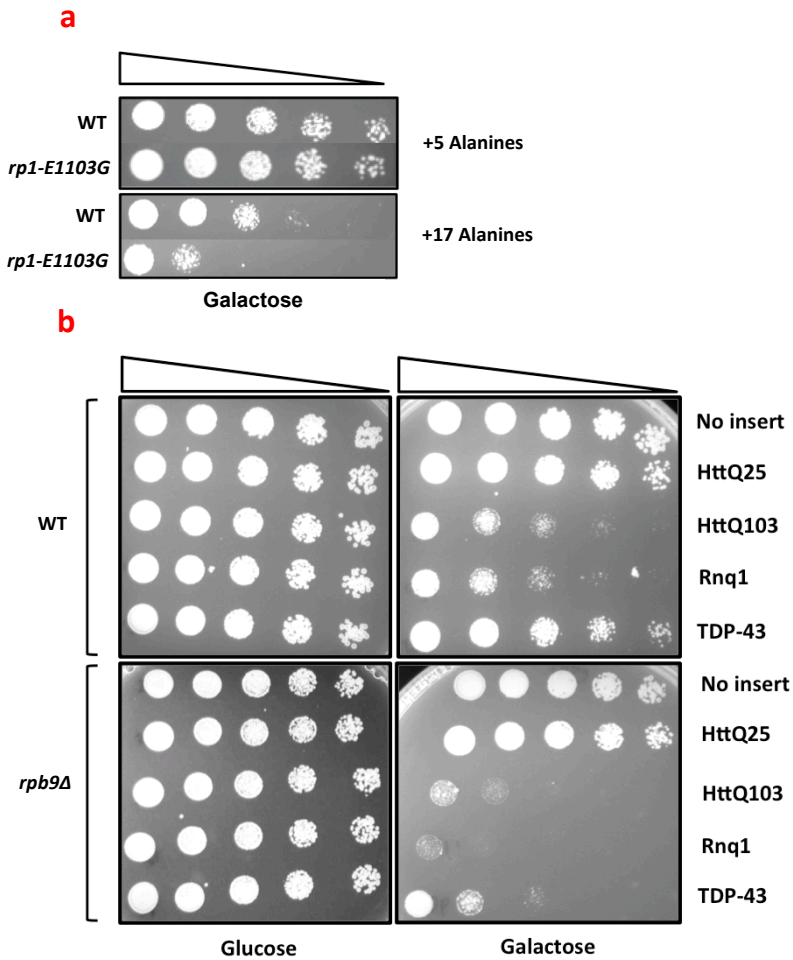

**Fig. S5.** Expression of proteotoxic genes in WT, *rpb1-E1103G* and *rpb9Δ* cells. (a) Cells were grown in raffinose and then plated on glucose and galactose. When the cells are grown on galactose (but not glucose) the proteotoxic genes are expressed. This experiment shows that a repeat sequence of 17 alanines is more toxic to *rpb1-E1103G* cells than WT cells, while a non-toxic repeat of 8 alanines had no effect (MVY0001-2). (b) A similar experiment shows that Htt103Q, Rnq1 and TDP-43 cause a greater drop in the viability of *rpb9Δ* cells than WT cells (MVY0001, 3).

Figure S6

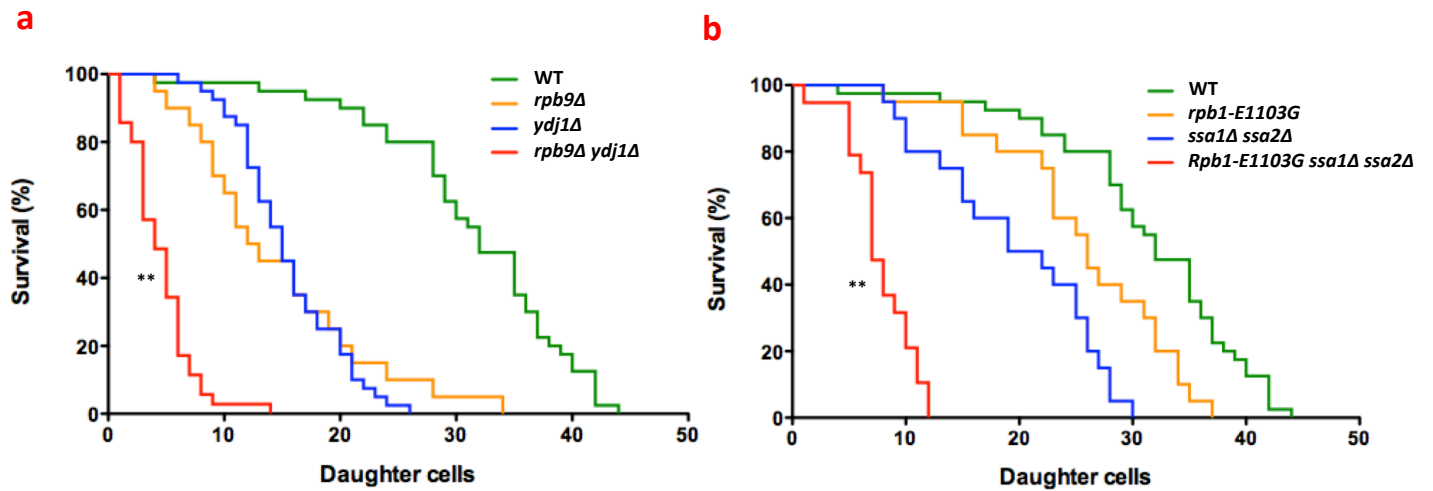

**Fig. S6.** Error prone cells have a shortened replicative lifespan in the absence of *YDJ1* or *SSA1* and *SSA2*. (a) When *YDJ1* is deleted in *rpb9Δ* cells, the lifespan of the *rpb9Δ* cells is reduced dramatically (MVY0001, 2, 4, 5). (b) When *SSA1* and *SSA2* are deleted in *rpb1-E1103G* cells, the lifespan of *rpb1-E1103G* cells is reduced dramatically as well (MVY0001, 2, 7, 8).

\*\*= P<0.01

Figure S7

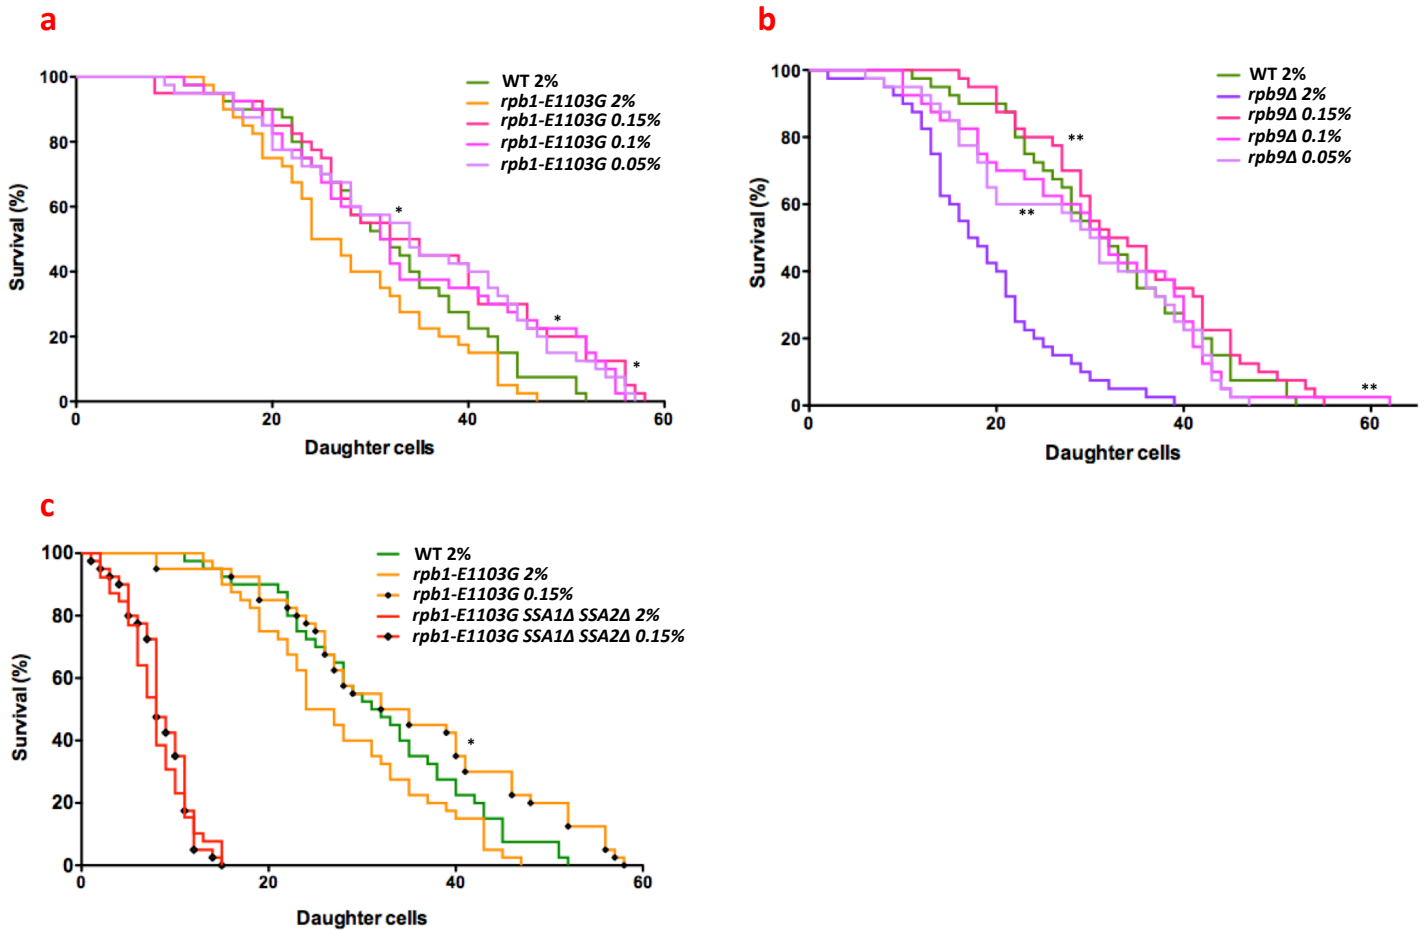

**Fig. S7.** Dietary restriction rescues the lifespan of error prone cells, but not error prone cells that have lost SSA1 and SSA2. (a) The lifespan of *rpb1-E1103G* cells is extended beyond the lifespan of WT cells when they are grown on 0.05, 0.1, or 0.15% glucose (MVY0001-2). (b) The lifespan of *rpb9Δ* cells is rescued by dietary restriction on 0.05, 0.1 and 0.15% glucose (MVY0001, 3). (c) Dietary restriction rescues the shortened lifespan of *rpb1-E1103G* cells, but not *rpb1-E1103G SSA1Δ SSA2Δ* cells (MVY0001, 2, 8).

\*= P<0.05, \*\*= P<0.01



## Supplemental tables

### Supplemental table 1

| Protein | Function                                                                          | <i>rpb9</i>   |         | <i>rpb1-E1103G</i> |         |
|---------|-----------------------------------------------------------------------------------|---------------|---------|--------------------|---------|
|         |                                                                                   | Fold increase | P-value | Fold increase      | P-value |
| Abp1    | Actin-binding protein                                                             | 3.5           | 0.001   | N/A                | N/A     |
| Aco1    | Required for the tricarboxylic acid cycle                                         | 2.9           | 0.001   | 2.4                | 0.0027  |
| Act1    | Actin, structural protein                                                         | 1.9           | 0.001   | N/A                | N/A     |
| Ahp1    | Peroxiredoxin, protects cells from oxidative damage                               | 3.4           | 0.001   | N/A                | N/A     |
| Asn2    | Asparagine biosynthesis                                                           | N/A           | N/A     | 2.9                | 0.041   |
| Bmh1    | 14-3-3 protein, controls proteome at post-transcriptional level                   | 2.3           | 0.001   | N/A                | N/A     |
| Cdc48   | Subunit of complex involved in ER-associated protein degradation, macroautophagy  | 2.2           | 0.006   | 2.4                | 0.0063  |
| Cdc60   | Cytosolic leucyl tRNA synthetase                                                  | 3.3           | 0.001   | 2.4                | 0.015   |
| Dug1    | Metallo-peptidase involved with glutathione degradation                           | 2.3           | 0.023   | 2.3                | 0.03    |
| Gpm1    | Phosphoglycerate mutase involved in glycolysis and gluconeogenesis                | 2             | 0.003   | N/A                | N/A     |
| Hsc82   | Cytoplasmic chaperone                                                             | 1.5           | 0.015   | 2                  | 0.00031 |
| Hsp104  | Disaggregase, helps refold and reactive previously denatured, aggregated proteins | 2.8           | 0.003   | N/A                | N/A     |
| Hsp26   | Small heat shock protein that suppresses unfolded protein aggregation             | 2.4           | 0.019   | N/A                | N/A     |
| Hsp60   | Mitochondrial chaperonin                                                          | 2.4           | 0.001   | N/A                | N/A     |
| Hxk2    | Catalyzes phosphorylation of glucose in the cytosol                               | 4.3           | 0.001   | 3.5                | 0.0049  |
| Idp1    | Mitochondrial isocitrate dehydrogenase                                            | N/A           | N/A     | 3                  | 0.0041  |
| Ipp1    | Cytoplasmic pyrophosphatase                                                       | 1.7           | 0.018   | N/A                | N/A     |
| Leu4    | Enzyme responsible for leucine biosynthesis                                       | 3.0           | 0.001   | N/A                | N/A     |
| Met6    | Methionine synthase                                                               | N/A           | N/A     | 2.6                | 0.00059 |
| Pfk1    | Involved in glycolysis                                                            | 2.3           | 0.007   | 2.5                | 0.0069  |
| Pfk2    | Involved in glycolysis                                                            | 4.2           | 0.001   | 2.6                | 0.011   |
| Pgk1    | Key enzyme in glycolysis and gluconeogenesis                                      | 1.6           | 0.001   | N/A                | N/A     |
| Pma1    | Regulator of cytoplasmic pH and membrane potential                                | 1.7           | 0.009   | 1.9                | 0.0087  |
| Por1    | Mitochondrial porin                                                               | 1.7           | 0.015   | N/A                | N/A     |
| Rcy1    | Involved in recycling of endocytosed proteins                                     | N/A           | N/A     | 2.2                | 0.014   |
| Rnr4    | Ribonucleotide reductase subunit involved in dNTP synthesis                       | 2.3           | 0.007   | N/A                | N/A     |
| Rpl7b   | 60S Ribosomal subunit                                                             | 2             | 0.014   | N/A                | N/A     |
| Sac6    | Actin-bundling protein                                                            | 4.4           | 0.002   | 4.2                | 0.0074  |
| Ssa1    | Chaperone of the Hsp70 family                                                     | 4.5           | 0.001   | 2.2                | 0.0001  |
| Ssa2    | Chaperone of the Hsp70 family                                                     | N/A           | N/A     | 1.7                | 0.0011  |
| Ssb2    | Ribosome associated chaperone                                                     | 2.4           | 0.001   | 2.2                | 0.00073 |
| Ssc1    | Hsp70 family ATPase                                                               | 1.7           | 0.016   | 1.8                | 0.021   |
| Sse1    | ATPase component of the Hso90 chaperone complex                                   | 2.1           | 0.001   | 2.7                | 0.0001  |
| Sti1    | Hsp90 co-chaperone                                                                | 2.9           | 0.006   | 4                  | 0.00033 |
| Sub2    | Involved in spliceosome assembly, RNA helicase                                    | N/A           | N/A     | 2.1                | 0.046   |
| Tdh2    | Dehydrogenase involved in glycolysis and gluconeogenesis                          | 3.4           | 0.01    | 4.1                | 0.0032  |
| Tpi1    | Glycolytic enzyme involved in redox metabolism                                    | 1.6           | 0.001   | N/A                | N/A     |
| Vas1    | Valyl tRNA synthetase                                                             | 5.0           | 0.001   | N/A                | N/A     |
| Wtm1    | Transcriptional modulator involved in RNR expression                              | 3.4           | 0.001   | N/A                | N/A     |
| Yef3    | Translational elongation factor                                                   | N/A           | N/A     | 1.6                | 0.0023  |

**Table S1.** Proteins upregulated in *rpb1-E1103G* and *rpb9Δ* cells compared to WT cells. Cells were grown into log-phase, lysed in liquid nitrogen, and analysed using mass spectrometry. All proteins that were significantly upregulated more than 1.5 fold in *Rpb9* and *rpb1-E1103G* cells are displayed.

The error prone cells exhibit increased levels of heat shock proteins (red). In addition, a substantial number of genes involved in energy metabolism were upregulated as well (blue, MVY0001-3)).
